# Supplementary material
Source: MDPI journal article supplement (https://www.mdpi.com/2073-4441/14/9/1355)
Supplement: s1 [file s1]

**Table S1.** Selected papers in the literature from 2002 to 2021.

| <b>Titles</b>                                                                                                                                          | <b>Authors</b>                                                                                       | <b>Subject Area</b>                 | <b>Year</b> | <b>Reference</b> |
|--------------------------------------------------------------------------------------------------------------------------------------------------------|------------------------------------------------------------------------------------------------------|-------------------------------------|-------------|------------------|
| <b>Morocco's coastal aquifers: Recent observations, evolution and perspectives towards sustainability</b>                                              | Ez-zaouy, Y., Bouchaou, L.<br>Saad, A., Hssaisoune, M.<br>Brouziyne, Y., Dhiba,<br>D., Chehbouni, A. | Environmental<br>Science            | 2021        | [14]             |
| <b>Geophysical data revealing the control of geological structures in the El Gouna springs in Souss river valley in Morocco</b>                        | Hssaisoune, M.,<br>Boutaleb, Tagma, T.,<br>Benssaou, M., Beraaouz, M.,<br>Karaoui, I., Bouchaou, L.  | Environmental<br>Science            | 2021        | [47]             |
| <b>Effect of Treated Wastewater on the Growth and Yield of Two Sweet Corn Varieties: Impact of Doses and Systems of Irrigation</b>                     | Belabhir, A., Mansir, I.,<br>Bouchaou, L., El Otmani,<br>M., Yaacoubi, B., Choukr-<br>Allah, R.      |                                     | 2021        | [57]             |
| <b>Agricultural intensification can no longer ignore water conservation – A systemic modelling approach to the case of tomato producers in Morocco</b> | Benabderrazik K.,<br>Kopainsky B., Tazi L.,<br>Joerin J., Six J.                                     | Agricultural Water<br>Management    | 2021        | [37]             |
| <b>A specific indicator approach for the assessment of water resource vulnerability in arid areas: the case of the Souss-Massa Region (Morocco)</b>    | Mansir I., Bouchaou L.,<br>Chebli B., Ait Brahim Y.,<br>Choukr-Allah R.                              | Environmental<br>Science            | 2021        | [21]             |
| <b>Global Climate Pattern Impacts on Long-Term Olive Yields in Northwestern Africa: Case from Souss-Massa Region</b>                                   | Abahous H., Bouchaou L.,<br>Chehbouni A.                                                             | Environmental<br>Sciences & Ecology | 2021        | [34]             |

|                                                                                                                                                                            |                                                                                       |                                           |      |      |
|----------------------------------------------------------------------------------------------------------------------------------------------------------------------------|---------------------------------------------------------------------------------------|-------------------------------------------|------|------|
| <b>Gis-based land suitability and crop vulnerability assessment under climate change in Chtouka ait baha, morocco</b>                                                      | Seif-Ennasr M.,Bouchaou L.,El Morjani Z. E.A.,Hirich A.,Beraaouz E.H.,Choukr-Allah R. |                                           | 2020 | [43] |
| <b>Monthly precipitations over semi-arid basins in Northern Africa: Homogenization and trends</b>                                                                          | Abahous H., Guijarro Jose A.,Sifeddine A., Chehbouni A., Ouazar D., Bouchaou L.       | Climatology                               | 2020 | [35] |
| <b>Monitoring of long-term land degradation trends based of Landsat observations - The case of land productivity trends in Souss-Massa Region</b>                          | Moussa S., Omar B.A., Hassan E.B.E.                                                   | Agricultural and Biological Sciences      | 2020 | [44] |
| <b>Moroccan groundwater resources and evolution with global climate changes</b>                                                                                            | Hssaisoune M., Bouchaou L., Sifeddine A., Bouimetarhan I., Chehbouni A.               | Geosciences/ Earth and Planetary Sciences | 2020 | [12] |
| <b>Irrigation water management and collective action: understanding the shift from community management to participatory management in Souss-Massa (Morocco)</b>           | Azemzi H., Erraoui E.                                                                 | Environmental Sciences & Ecology          | 2020 | [39] |
| <b>New evidences on groundwater dynamics from the Souss-Massa system (Morocco): Insights gained from dissolved noble gases</b>                                             | Hssaisoune, M., Bouchaou, L., Matsumoto, T., Araguas, L., Kraml, M., Aggarwal, P.     | Geochemistry & Geophysics                 | 2019 | [55] |
| <b>Assessment of water quality and nitrate source in the Massa catchment (Morocco) using <math>\delta^{15}\text{N}</math> and <math>\delta^{18}\text{O}</math> tracers</b> | Danni, S., Bouchaou, L., Elmouden, A., Ait Brahim, Y., N'da, B.                       | Environmental Science & chemistry         | 2019 | [49] |

|                                                                                                                         |                                                                                                                               |                                      |      |      |
|-------------------------------------------------------------------------------------------------------------------------|-------------------------------------------------------------------------------------------------------------------------------|--------------------------------------|------|------|
| <b>Assessment of the Groundwater Salinity Used for Irrigation and Risks of Soil Degradation in Souss-Massa, Morocco</b> | El Oumlouki K., Moussadek R., Douaik A., Iaaich H., Dakak H., Chati M.T., Ghanimi A., El Midaoui A., El Amrani M., Zouahri A. | Agricultural and Biological Sciences | 2018 | [45] |
| <b>Trend and change point analyses of annual precipitation in the Souss-Massa Region in Morocco during 1932-2010</b>    | Abahous H., Ronchail J., Sifeddine A., Kenny L., Bouchaou L.                                                                  | Meteorology & Atmospheric Sciences   | 2018 | [36] |
| <b>Isotopes to assess sustainability of overexploited groundwater in the Souss–Massa system (Morocco)</b>               | Hssaisoune M., Bouchaou L., N'da B., Malki M., Abahous H., Fryar A.E.                                                         | Environmental Science - Chemistry    | 2017 | [19] |
| <b>Water use efficiency and valuation in agriculture in the Souss-Massa</b>                                             | Elame F., Lionbouli H., Choukr-Allah R.                                                                                       | Environmental Science                | 2017 | [38] |
| <b>Contribution of seawater desalination to cope with water scarcity in Souss-Massa region in southern Morocco</b>      | Hirich A., Choukr-Allah R., Nrhira A., Malki M., Bouchaou L.                                                                  | Environmental Science                | 2017 | [23] |
| <b>Water resources master plan for sustainable development of the Souss-Massa River Basin</b>                           | Choukr-Allah R., Nghira A., Hirich A., Bouchaou L.                                                                            | Environmental Science                | 2017 | [1]  |
| <b>Assessment of climate and land use changes: Impacts on groundwater resources in the Souss-Massa river basin</b>      | AitBrahim Y., Seif-Ennasr M., Malki M., N'da B., Choukrallah R., El Morjani Z.E.A., Sifeddine A., Abahous H., Bouchaou L.     | Environmental Science                | 2017 | [5]  |

|                                                                                                                                |                                                                                                                            |                           |      |      |
|--------------------------------------------------------------------------------------------------------------------------------|----------------------------------------------------------------------------------------------------------------------------|---------------------------|------|------|
| <b>Assessment of groundwater quality: Impact of natural and anthropogenic contamination in Souss-Massa river basin</b>         | Malki M., Choukr-Allah R., Bouchaou L., Hirich A., AitBrahim Y., Krimissa S., Hssaisoune M., Nghira A., Barceló D.         | Environmental Science     | 2017 | [46] |
| <b>Groundwater Resources Scarcity in Souss-Massa Region and Alternative Solutions for Sustainable Agricultural Development</b> | Mansir I., Bouchaou L., Choukr-allah R., Chebli B., El Otmani M.                                                           | Environmental Science     | 2018 | [42] |
| <b>Inter-annual variability of precipitation in the Souss Massa region and linkage of the North Atlantic Oscillation.</b>      | Abahous, H Sifeddine, A. Bouchaou, L Ronchail, J. Morjani, Z.E.A., Ait Brahim Y., Kenny L.                                 | Environmental Science     | 2017 | [6]  |
| <b>Assessment of Global Change Impacts on Groundwater Resources in Souss-Massa Basin</b>                                       | Seif-Ennasr M., Malki M., Bouchaou L., Beraaouz E.H., Hirich A., Zaaboul R., El Morjani Z.E.A., Choukr-Allah R., Nrhira A. |                           | 2017 | [2]  |
| <b>Socio-economics and governance of water resources in the Souss-Massa river basin</b>                                        | Moha H., Fouad E., Houria A., Choukr-Allah R.                                                                              | Environmental Science     | 2017 | [41] |
| <b>Impact of agricultural practices on groundwater quality in intensive irrigated area of Chtouka-Massa, Morocco</b>           | Malki M., Bouchaou L., Hirich A., AitBrahim Y., Choukr-Allah R.                                                            | Environmental Science     | 2017 | [22] |
| <b>The origin of geothermal waters in Morocco: Multiple isotope tracers for delineating sources of water-rock interactions</b> | Bouchaou L., Warner NR., Tagma T., Hssaisoune M., Vengosh A.,                                                              | Geochemistry & Geophysics | 2017 | [56] |

|                                                                                                                                                                                                  |                                                                                                                                       |                                                                |      |      |
|--------------------------------------------------------------------------------------------------------------------------------------------------------------------------------------------------|---------------------------------------------------------------------------------------------------------------------------------------|----------------------------------------------------------------|------|------|
| <b>Evolution of groundwater quality in intensive agricultural zone: case of Chtouka-Massa Aquifer, Morocco</b>                                                                                   | Malki M., Choukr-Allah R., Bouchaou L., AitBrahim Y., Hirich A., Reichert B.                                                          | Geology                                                        | 2016 | [3]  |
| <b>Climate change and adaptive water management measures in Chtouka Aït Baha region (Morocco)</b>                                                                                                | Seif-Ennasr M., Zaaboul R., Hirich A., Caroletti G.N., Bouchaou L., El Morjani Z.E.A., Beraaouz E.H., McDonnell R.A., Choukr-Allah R. |                                                                | 2016 | [15] |
| <b>Feasibility of using desalination for irrigation in the souss massa region in the South of Morocco</b>                                                                                        | Hirich A., Choukr-Allah R., Rami A., El-Otmani M.                                                                                     | Environmental Science-Engineering-Earth and Planetary Sciences | 2015 | [40] |
| <b>Projections climatiques pour la région de Souss Massa Drâa: décades 2045-55 et 2090-2100. Paper presented at the Séminaire de diffusion des résultats du projet Climatique, Agadir, Maroc</b> | Díaz JP., Pérez JC.                                                                                                                   |                                                                | 2014 | [32] |
| <b>Etude des impacts des changements climatiques sur les ressources hydriques de la region souss-massa-draa.</b>                                                                                 | Moroccan agency for solar energy (MAZEN)                                                                                              |                                                                | 2014 | [31] |
| <b>Occurrence and mobilization of radium in fresh to saline coastal groundwater inferred from geochemical and isotopic tracers (Sr, S, O, H, Ra, Rn)</b>                                         | Vinson, D.S., Tagma T., Bouchaou L. Dwyer G.S., Warner N.R., Vengosh A.                                                               | Applied Geochemistry                                           | 2013 | [82] |
| <b>Water valuation in agriculture in the Souss-Massa Basin (Morocco)</b>                                                                                                                         | Elame F., Doukkali R.                                                                                                                 | Agricultural and Biological Sciences                           | 2012 | [83] |

|                                                                                                                                                                                           |                                                                                                   |                                                      |      |      |
|-------------------------------------------------------------------------------------------------------------------------------------------------------------------------------------------|---------------------------------------------------------------------------------------------------|------------------------------------------------------|------|------|
| <b>Isotopes and groundwater management strategies under semi-arid area: Case of the Souss upstream basin (Morocco)</b>                                                                    | Bouragba L., Mudry J., Bouchaou L., Hsissou Y., Krimissa M., Tagma ., Michelot J.,                | Physics/Isotopes                                     | 2011 | [16] |
| <b>Climate change and its impacts on groundwater resources in Morocco: The case of the Souss- Massa basin</b>                                                                             | Bouchaou L., Tagma T., Boutaleb S., Hssaisoune M., El Morjani Z.E.A.,                             | Environmental Science                                | 2011 | [4]  |
| <b>An isotopic study of surface water and groundwater in a semi-arid environment: Souss-Massa basin in SW Morocco</b>                                                                     | Bouchaou L., Tagma T., Hsissou Y., Ikenne M., Boutaleb S., Bouragba L., Mudry J., Michelot J.L.   | Earth and Planetary Sciences                         | 2009 | [17] |
| <b>Groundwater nitrate pollution in Souss-Massa basin</b>                                                                                                                                 | Tagma T., Hsissou Y., Bouchaou L., Bouragba L.                                                    | Environmental Science                                | 2009 | [13] |
| <b>Application of multiple isotopic and geochemical tracers for investigation of recharge, salinization, and residence time of water in the Souss-Massa aquifer, southwest of Morocco</b> | Bouchaou L., Michelot J.L., Vengosh A., Hsissou Y., Qurtobi M., Gaye C.B., Bullen T.D., Zuppi G.M | Engineering; Geology; Water Resources                | 2008 | [48] |
| <b>Etude de Révision du Plan Directeur d'Aménagement Intégré des Ressources en Eau (PDAIRE) des bassins du Souss Massa</b>                                                                | Agence du bassin hydraulique Souss-Massa                                                          |                                                      | 2007 | [27] |
| <b><math>2\text{H}</math> and <math>18\text{O}</math> isotopic study of ground waters under a semi-arid climate</b>                                                                       | Bouchaou L., Hsissou Y., Krimissa M., Krimissa S., Mudry J.                                       | Earth and Planetary Sciences / Environmental Science | 2005 | [18] |

---

**Use of chemical tracing to study acquisition  
modalities of the mineralization and behaviour of  
unconfined groundwaters under a semi-arid  
climate: The case of the Souss plain (Morocco)**

---

Hsissou Y., Bouchaou L.,  
Mudry J., Mania J., Chauve  
P.

2002 [20]
